# Supplementary material for: Circulating cell-free DNA content as blood based biomarker in endometrial cancer
Source: PubMed Central journal article supplement (PMC5777767; doi:10.18632/oncotarget.23247), 2017-12-14
Supplement: oncotarget-08-115230-s001.pdf [file oncotarget-08-115230-s001.pdf]

## Circulating cell-free DNA content as blood based biomarker in endometrial cancer

### SUPPLEMENTARY MATERIALS

**Supplementary Table 1: NLR, MLR and NLR in our cohort of EC patients. Cluster analysis in G1, G2 and G3 EC and blood pressure level (hypertensive or not hypertensive)**

| Endometrial cancer (grade)                                                        | G1                     | G2                    | G3                     |
|-----------------------------------------------------------------------------------|------------------------|-----------------------|------------------------|
| <i>Platelet-to- lymphocyte ratio (PLR)</i><br><i>Average concentration Range</i>  | 122,7± 15,9 71,4-208,6 | 122,1± 8,7 51,3-239,7 | 122,7± 13,3 50,9-220,8 |
| <i>Neutrophil-to-lymphocyte ratio (NLR)</i><br><i>Average concentration Range</i> | 1,9 ± 0,4 1,1-4,1      | 2,4 ± 0,3 0,9-8,4     | 3,8 ± 0,7 1,3-13,5     |
| <i>Monocyte-to-lymphocyte ratio (MLR)</i><br><i>Average concentration Range</i>   | 0,3 ± 0,03 0,2-0,4     | 0,3 ± 0,02 0,1-0,4    | 0,4 ± 0,05 0,3-0,9     |
| <i>Not hypertensive with NLR &gt;2,0 x10<sup>3</sup> (%)</i>                      | 40                     | 26,6                  | 71,4                   |
| <i>Hypertensive with NLR &gt;2,0 x10<sup>3</sup> (%)</i>                          | 40                     | 55,5                  | 70                     |
| <i>Not hypertensive with MLR &gt;0,3 x10<sup>3</sup> (%)</i>                      | 0                      | 13,3                  | 42,8                   |
| <i>Hypertensive with MLR &gt;0,3 x10<sup>3</sup> (%)</i>                          | 40                     | 22,2                  | 70                     |

**Supplementary Table 2: List of primers for mtcfDNA relative content assessment**

---

|               |                                 |
|---------------|---------------------------------|
| FWD ND1       | 5'-CCCTAAAACCCGCCACATCT-3'      |
| REV ND1       | 5'-GAGCGATGGTGAGAGCTAAGGT-3'    |
| FWD mtDNA 16S | 5'-CAGCCGCTATTAAAGGTTCG-3'      |
| REV mtDNA 16S | 5'-CCTGGATTACTCCGGTCTGA-3'      |
| FWD HGB       | 5'-GTGCACCTGACTCCTGAGGAGA-3'    |
| REV HGB       | 5'-CCTTGATACCAACCTGCCCAG-3'     |
| FWD 36B4      | 5'-CAGCAAGTGGGAAGGTGTAATCC-3'   |
| REV 36B4      | 5'-CCCATTCTATCATCAACGGGTACAA-3' |

---
